# Supplementary material
Source: PubMed Central journal article supplement (PMC2253626)
Supplement: pbio.0060033.st002.pdf [file pbio.0060033.st002.pdf]

| Region         |             | base model<br>$\lambda = 0.5$<br>$\times 10^3$ | no<br>autocorrelation<br>$\times 10^3$ | $\lambda = 1$<br>$\times 10^4$ | $\lambda = 2$<br>$\times 10^8$ | fixed effects<br>$\times 10^3$ | all fixed,<br>Gamma errors<br>$\times 10^3$ |
|----------------|-------------|------------------------------------------------|----------------------------------------|--------------------------------|--------------------------------|--------------------------------|---------------------------------------------|
| Ireland trout  | $\gamma$    | -18.726                                        | -18.957                                | -6.797                         | -1.465                         | -21.543                        | -19.825                                     |
|                | <i>s.e.</i> | 2.647                                          | 2.261                                  | 2.187                          | 0.981                          | 2.447                          | 1.783                                       |
|                | AIC         | 2178.873                                       | 2335.682                               | 2255.875                       | 2262.657                       | NA                             | NA                                          |
| Scotland catch | $\gamma$    | -5.643                                         | -0.309                                 | -1.279                         | -0.053                         | -0.094                         | -0.095                                      |
|                | <i>s.e.</i> | 1.394                                          | 0.257                                  | 0.29                           | 0.013                          | 0.257                          | 0.256                                       |
|                | AIC         | -11.15                                         | 81.524                                 | -14.483                        | -12.084                        | NA                             | NA                                          |
| Scotland count | $\gamma$    | -2.583                                         | -2.621                                 | -0.361                         | -0.024                         | -2.067                         | -2.491                                      |
|                | <i>s.e.</i> | 0.97                                           | 0.505                                  | 0.673                          | 0.044                          | 0.543                          | 0.508                                       |
|                | AIC         | 569.673                                        | 739.618                                | 610.78                         | 610.753                        | NA                             | NA                                          |
| Newfoundland   | $\gamma$    | -16.338                                        | -24.093                                | 24.052                         | 55.454                         | -25.972                        | -27.75                                      |
|                | <i>s.e.</i> | 7.5                                            | 6.214                                  | 20.303                         | 48.855                         | 6.243                          | 6.371                                       |
|                | AIC         | 412.694                                        | 498.006                                | 465.314                        | 465.429                        | NA                             | NA                                          |
| Fundy, inner   | $\gamma$    | -23.683                                        | -24.004                                | -9.467                         | -1.519                         | -25.76                         | -21.586                                     |
|                | <i>s.e.</i> | 5.997                                          | 2.275                                  | 3.281                          | 0.762                          | 2.624                          | 1.575                                       |
|                | AIC         | 407.231                                        | 561.951                                | 410.047                        | 414.056                        | NA                             | NA                                          |
| Saint John     | $\gamma$    | -14.725                                        | -9.891                                 | -4.337                         | -0.208                         | -11.302                        | -7.916                                      |
|                | <i>s.e.</i> | 4.121                                          | 2.141                                  | 2.311                          | 0.52                           | 2.294                          | 1.402                                       |
|                | AIC         | 296.148                                        | 484.079                                | 305.046                        | 308.406                        | NA                             | NA                                          |
| Fundy, outer   | $\gamma$    | -18.69                                         | -53.297                                | -36.8                          | -12.221                        | -14.54                         | -15.821                                     |
|                | <i>s.e.</i> | 1.972                                          | 3.372                                  | 4.926                          | 14.646                         | 2.271                          | 1.511                                       |
|                | AIC         | NA                                             | 558.996                                | 738.046                        | 1273.499                       | NA                             | NA                                          |
| BC coho        | $\gamma$    | -0.898                                         | -8.124                                 | -0.094                         | 0.012                          | -13.84                         | -11.764                                     |
|                | <i>s.e.</i> | 4.081                                          | 2.601                                  | 1.77                           | 0.257                          | 2.917                          | 2.319                                       |
|                | AIC         | 269.24                                         | 320.049                                | 269.285                        | 269.285                        | NA                             | NA                                          |
| BC pink        | $\gamma$    | -8.426                                         | -7.998                                 | -4.161                         | -0.751                         | -7.141                         | -6.373                                      |
|                | <i>s.e.</i> | 2.133                                          | 1.89                                   | 1.001                          | 0.196                          | 2.012                          | 1.626                                       |
|                | AIC         | 398.195                                        | 404.162                                | 402.525                        | 405.281                        | NA                             | NA                                          |
| BC chum        | $\gamma$    | -3.227                                         | -2.963                                 | -1.299                         | -0.148                         | -2.428                         | -2.627                                      |
|                | <i>s.e.</i> | 1.809                                          | 1.301                                  | 0.9                            | 0.177                          | 1.333                          | 1.261                                       |
|                | AIC         | 351.759                                        | 368.446                                | 355.53                         | 356.854                        | NA                             | NA                                          |
