# Supplementary material
Source: PubMed Central journal article supplement (PMC2253626)

# Percent survival

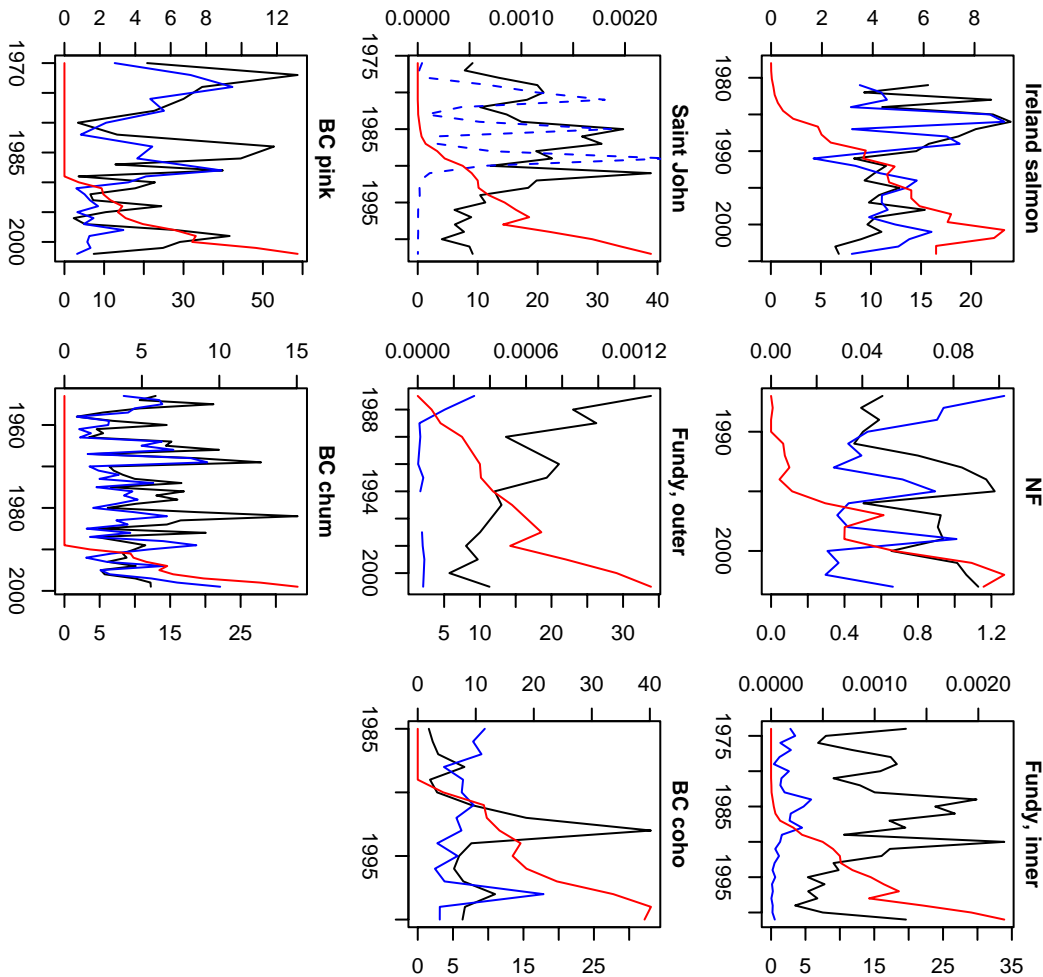

Farmed salmon production (1,000 t)

Supplement: pbio.0060033.sg001.pdf [file pbio.0060033.sg001.pdf]
